# Supplementary material for: Modeling human cancer-related regulatory modules by GA-RNN hybrid algorithms
Source: PubMed Central journal article supplement (PMC1838431; doi:10.1186/1471-2105-8-91), 2007-03-14
Supplement: 1471-2105-8-91-S4.pdf [file 1471-2105-8-91-S4.pdf]

## Additional file 4 – Examples of TFs and their specific binding sites sequences

### A. Human TFs and their specific binding sites sequences

|                                                                                                                              |
|------------------------------------------------------------------------------------------------------------------------------|
| <b>TF name : CDC6 (cell division cycle 6)</b>                                                                                |
| <i>GO annotations</i> : GO:0007049, GO:0051301, GO:0008156,<br><i>Binding sites sequences</i> : TTTCGCGCCAAA                 |
| <b>TF name : PCAF (p300/CBP-associated factor)</b>                                                                           |
| <i>GO annotations</i> : GO:0003712, GO:0006355, GO:0008285<br><i>Binding sites sequences</i> : CTTTATTTTGGTGAATTAGCAACAAAGAA |
| <b>TF name : CCNB2 (cyclin B2)</b>                                                                                           |
| <i>GO annotations</i> : GO:0000074<br><i>Binding sites sequences</i> : TGGCCCCTGGGGATGTGTGCTTCA                              |
| <b>TF name : CDK7 (cyclin-dependent kinase 7)</b>                                                                            |
| <i>GO annotations</i> : GO:0045893, GO:0051301, GO:0000079<br><i>Binding sites sequences</i> : ATATTTTATATATACAGTATCT        |
| <b>TF name : E2F1 (E2F transcription factor 1)</b>                                                                           |
| <i>GO annotations</i> : GO:0000074, GO:0000080, GO:0000122, GO:0003700<br><i>Binding sites sequences</i> : TTTCGCGC          |
| <b>TF name : HDAC3 (histone deacetylase 3)</b>                                                                               |
| <i>GO annotations</i> : GO:0000074, GO:0006355, GO:0007346, GO:0008134<br><i>Binding sites sequences</i> : TTCCAGGCTCCTCACT  |

We collect known transcription factor binding sites sequences from ENSEMBL, TRANSFAC, SGD and YPD databases for human and yeast.

## B. Examples of yeast TFs and their specific binding sites sequences

|                                                                                                                                |
|--------------------------------------------------------------------------------------------------------------------------------|
| <b>TF name : ABF1 (YKL112W)</b>                                                                                                |
| <i>GO annotations</i> : GO:0006355, GO:0003700, GO:0045941<br><i>Binding sites sequences</i> : RTCAYTNNNNACGW                  |
| <b>TF name : ACE2 (YLR131c)</b>                                                                                                |
| <i>GO annotations</i> : GO:0006355, GO:0016563, GO:0000114<br><i>Binding sites sequences</i> : TGCTGGT                         |
| <b>TF name : FKH2 (YNL068C )</b>                                                                                               |
| <i>GO annotations</i> : GO:0000074, GO:0000116, GO:0003700,<br>GO:0006355<br><i>Binding sites sequences</i> : GTAAACA, RYMAAYA |
| <b>TF name : MCM1 (YMR043W)</b>                                                                                                |
| <i>GO annotations</i> : GO:0003700, GO:0003702, GO:0006355<br><i>Binding sites sequences</i> : WTWCCYAAWNNGGTAA                |
| <b>TF name : MSN4 (YKL062W)</b>                                                                                                |
| <i>GO annotations</i> : GO:0006355, GO:0003700<br><i>Binding sites sequences</i> : AAGGGG                                      |
| <b>TF name : MAC1 (YMR021C)</b>                                                                                                |
| <i>GO annotations</i> : GO:0006355, GO:0003700<br><i>Binding sites sequences</i> : TTTGCTC                                     |
| <b>TF name : RAP1 (YNL216W)</b>                                                                                                |
| <i>GO annotations</i> : GO:0003700, GO:0006355, GO:0045449<br><i>Binding sites sequences</i> : WRMACCCATACAYY                  |
| <b>TF name : STE12 (YHR084w)</b>                                                                                               |
| <i>GO annotations</i> : GO:0003700, GO:0006355, GO:0007329<br><i>Binding sites sequences</i> : ATGAAACA                        |
| <b>TF name : SWI4 (YER111c)</b>                                                                                                |
| <i>GO annotations</i> : GO:0003700, GO:0006355<br><i>Binding sites sequences</i> : CACGAAAA                                    |

We collect known transcription factor binding sites sequences from ENSEMBL, TRANSFAC, SGD and YPD databases for human and yeast.
