# Supplementary material for: Modeling human cancer-related regulatory modules by GA-RNN hybrid algorithms
Source: PubMed Central journal article supplement (PMC1838431; doi:10.1186/1471-2105-8-91), 2007-03-14
Supplement: 1471-2105-8-91-S6.pdf [file 1471-2105-8-91-S6.pdf]

## Additional file 6 - The architecture of RBF classifier

The first kind of input nodes represent the original time points of gene expression values after being re-scaled between 0 and 1. The other kind of input nodes indicate the amino acids sequences of known transcription factor binding sites obtained from databases, which are also encoded into a number between 0 and 1. Let  $X$  represents the input layer vector, and  $G_i$  (where  $i=1, 2, \dots, n$ ) represent the neurons in the hidden layer, which is a Gaussian kernel in the form:

$$G_i(X, \mu_i) = \exp\left(\frac{-1}{2\sigma_i^2} \|X - \mu_i\|^2\right) \quad (1)$$

where  $\mu_i$  is a vector representing the center of  $i$  kernel and  $\sigma_i^2$  is the corresponding variance. The output layer implements a weighted sum of hidden-output units:

$$F(X) = \sum_{i=1}^m w_i G(X, \mu_i) - \theta \quad \text{for } i = 1, 2, \dots, m \quad (2)$$

where  $w_i$  is the weight, and each corresponds individually to the connection between a hidden neuron and an output neuron. Later we use gradient descent to determine the weights of the network. At last, the vector  $\theta$  represents biases. Finally, the outputs of RBF are “labels” that describe what categories the input TFs belong to.

Figure 1 - The architecture of RBF classifier

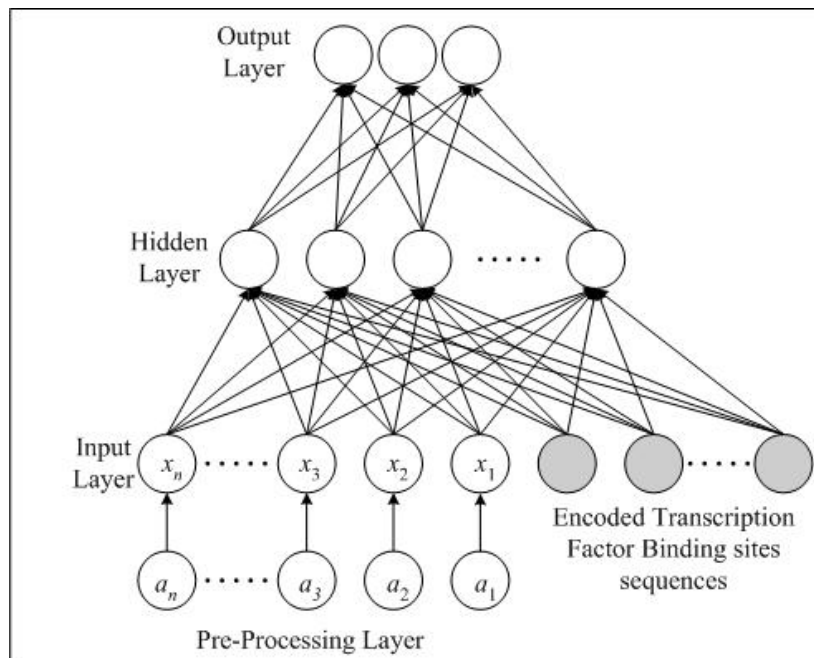

The shaded circles indicate the sequences of transcription factor binding sites.
